# Supplementary material for: Retrons and their applications in genome engineering
Source: PubMed Central journal article supplement (PMC6868368; doi:10.1093/nar/gkz865), 2019-10-10
Supplement: gkz865_supplemental_file.pdf [file gkz865_supplemental_file.pdf]

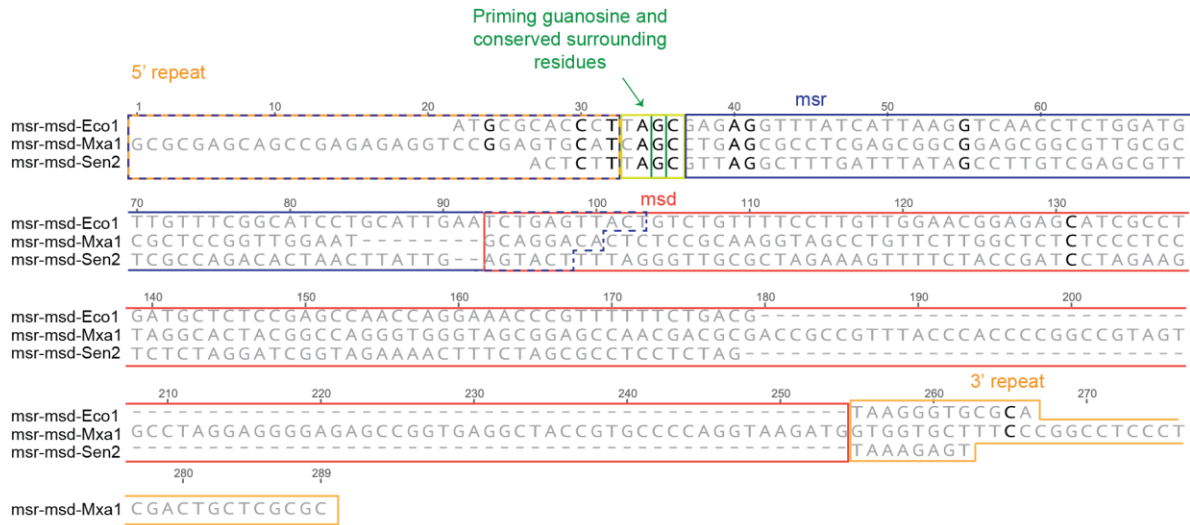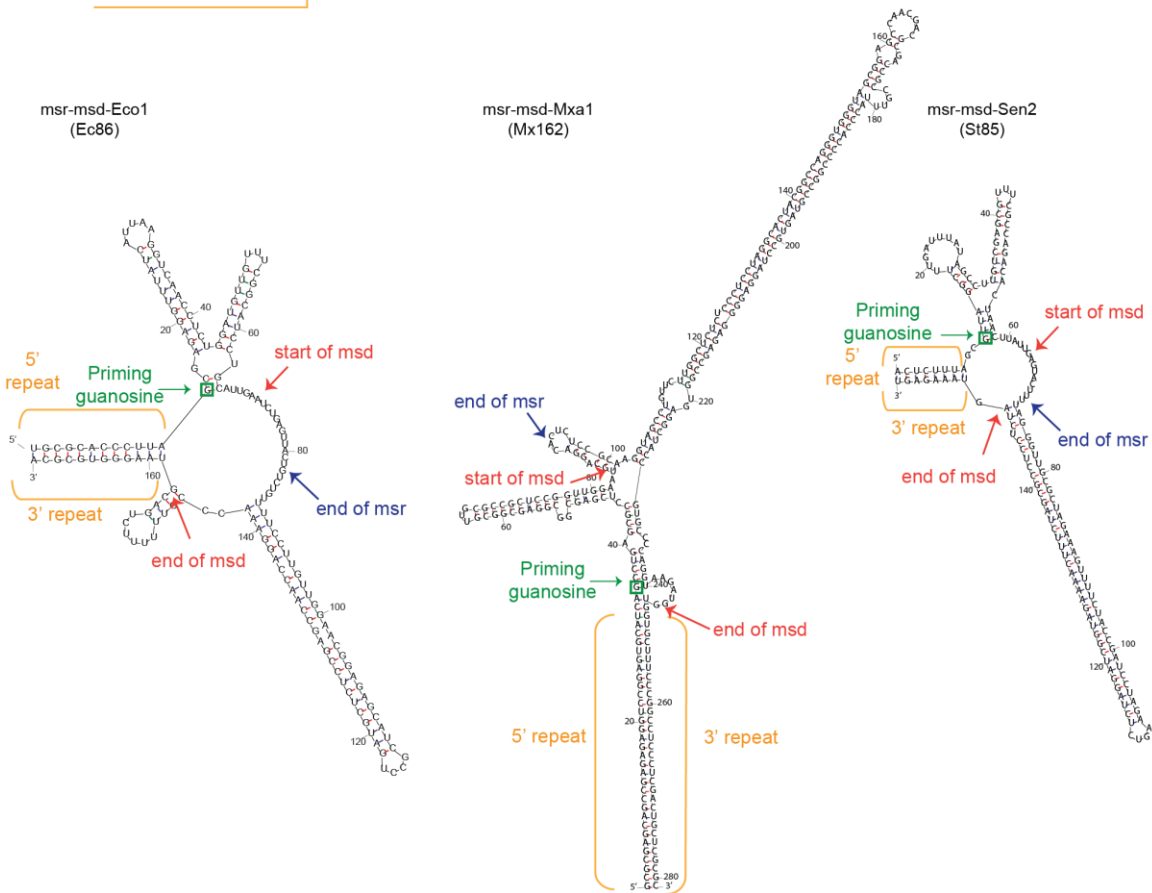

**Figure S1. Msr-msd sequences and structures.** Top: Alignment of representative msr-msd DNA sequences from Retron-Eco1 (Ec86), Retron-Mxa1 (Mx162), and Retron-Sen2 (St85). Bases that are conserved between all three sequences are in black; others are in grey. The 5' and 3' repeats, priming guanosines, conserved region surrounding the priming guanosines, msrs, and msds are boxed and labelled in orange, green, yellow-green, blue, and red, respectively. Bottom: Mfold-predicted most favorable msr-msd transcript structures (1).

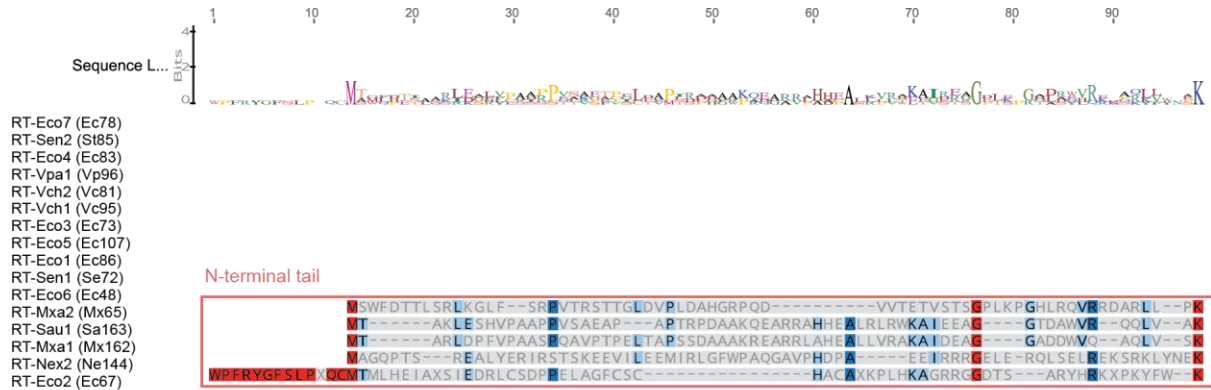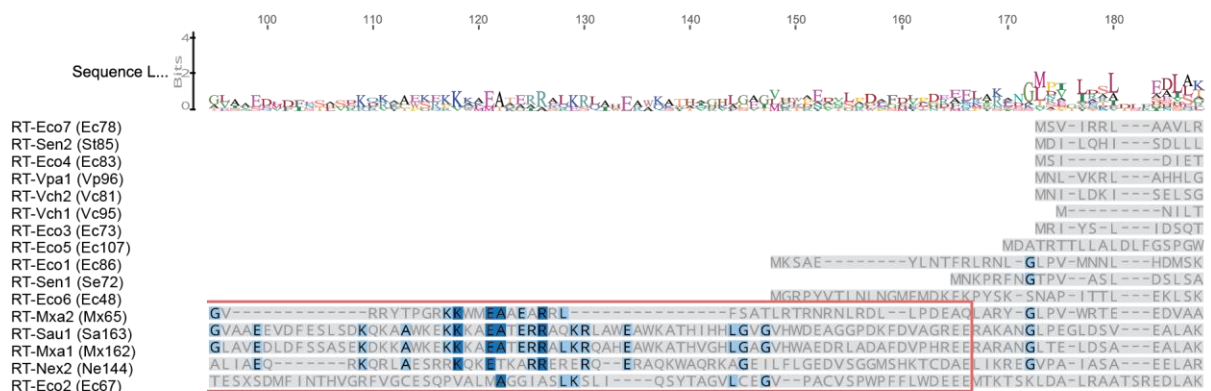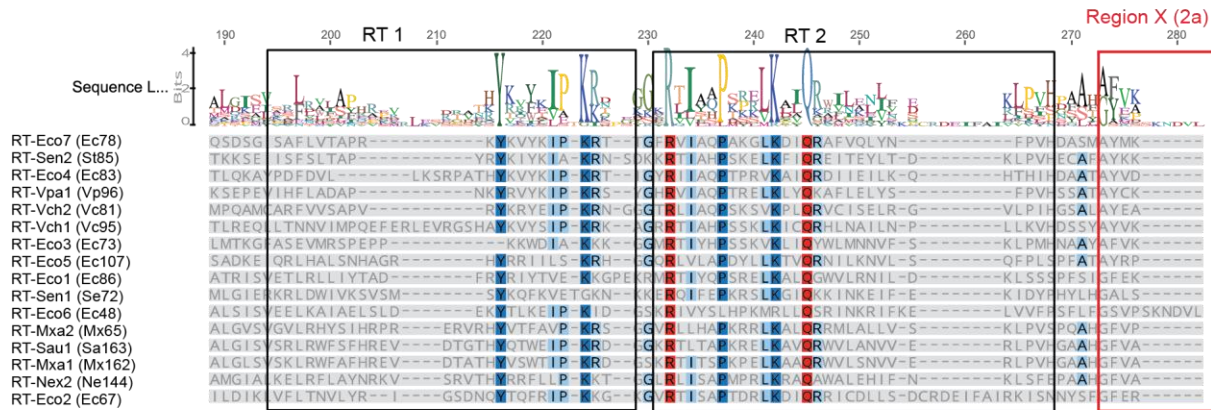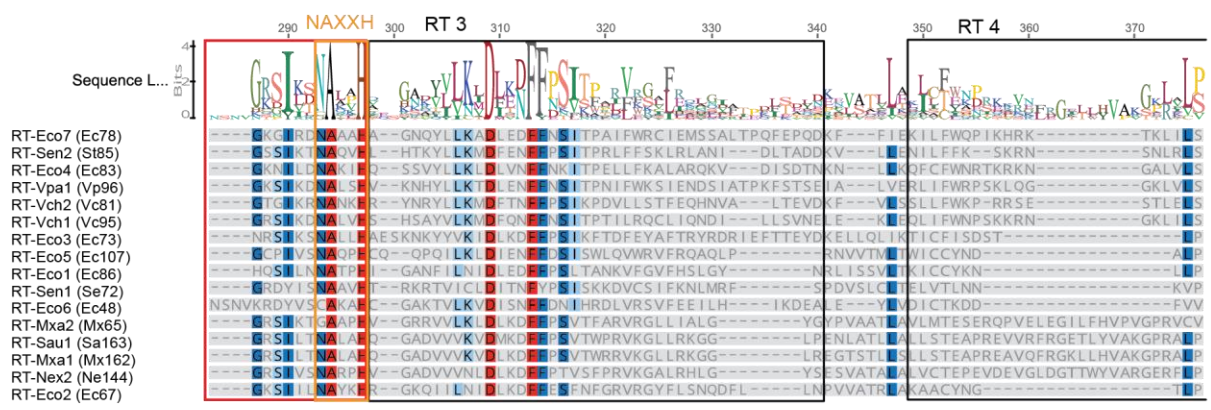

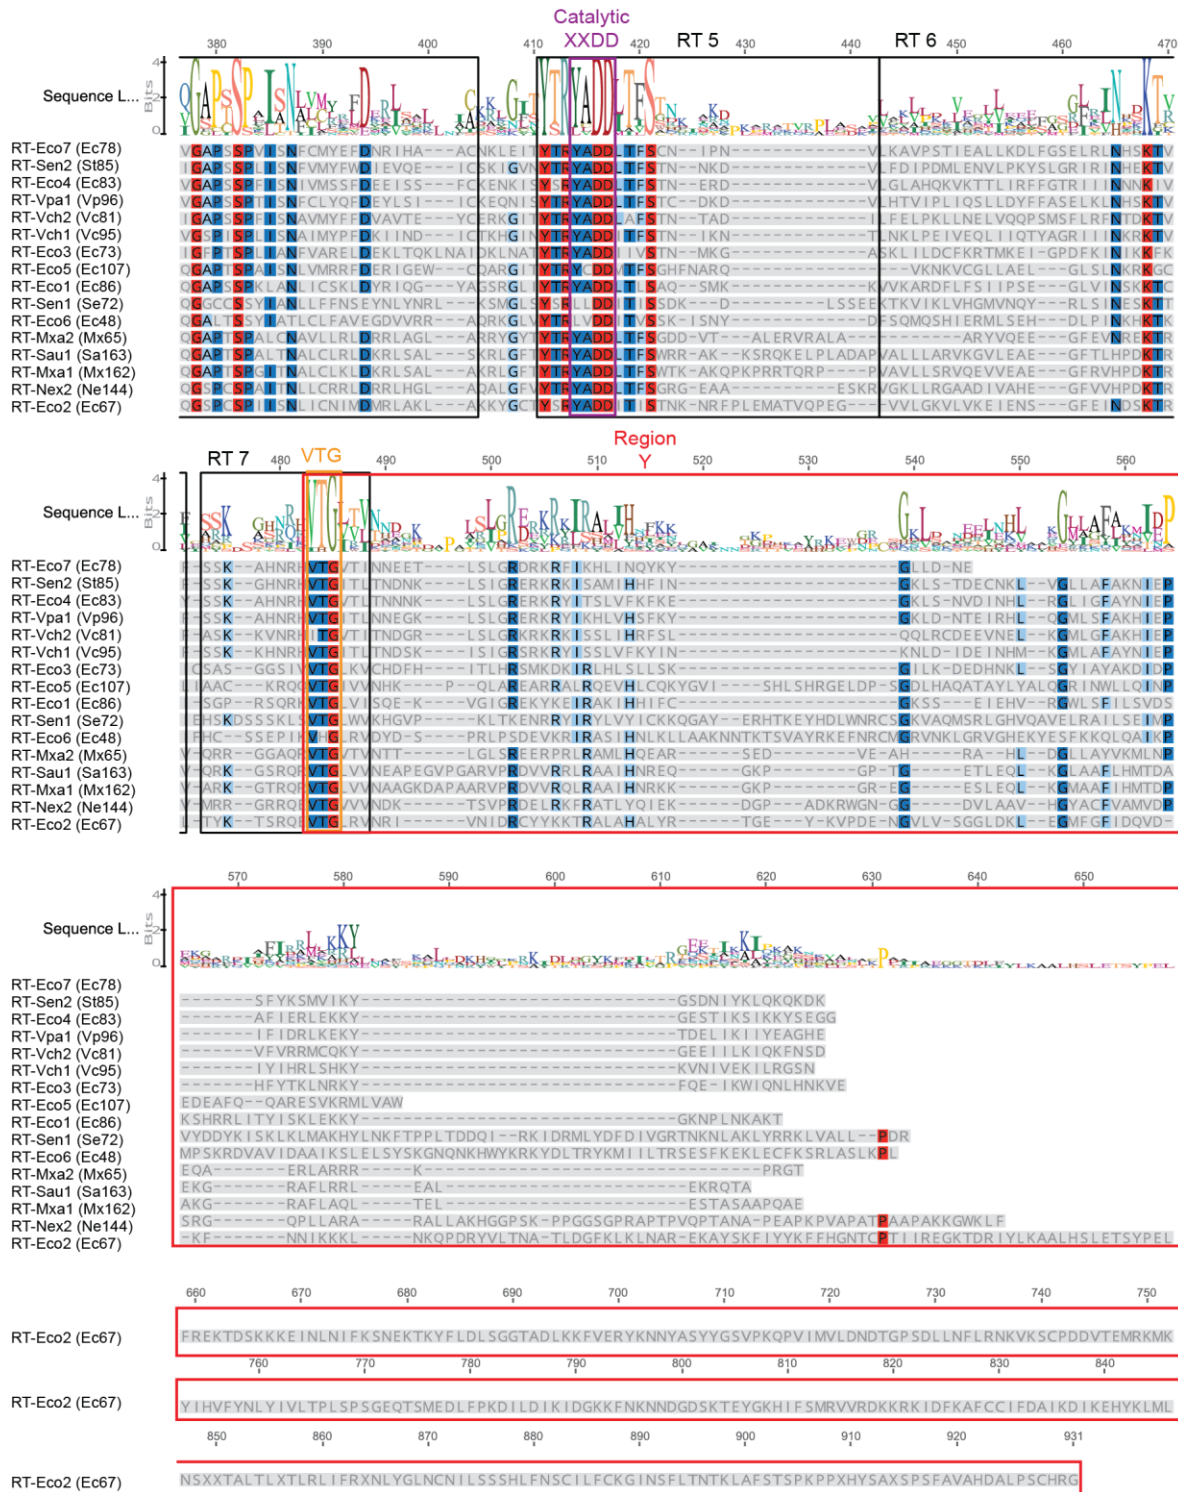

**Figure S2. Alignment of all 16 experimentally validated retron RT sequences.** Conserved RT regions are boxed in black, retron specific-regions in red, retron-specific motifs NAXXH and VTG in orange, and the catalytic XXDD tetrad in purple.

|              | Eco7 (Ec78) | Sen2 (St85) | Eco4 (Ec83) | Vpa1 (Vp96) | Vch2 (Vc81) | Vch1 (Vc95) | Eco3 (Ec73) | Eco5 (Ec107) | Eco1 (Ec86) | Sen1 (Se72) | Ec4 (Ec48) | Mxa2 (Mx65) | Sau1 (Se163) | Mxa1 (Mx162) | Nex2 (Ne144) | Eco2 (Ec67) |
|--------------|-------------|-------------|-------------|-------------|-------------|-------------|-------------|--------------|-------------|-------------|------------|-------------|--------------|--------------|--------------|-------------|
| Eco7 (Ec78)  |             | 43.8        | 42.0        | 58.2        | 42.0        | 42.0        | 27.7        | 24.8         | 23.8        | 15.4        | 15.9       | 21.2        | 22.3         | 23.8         | 19.7         | 21.8        |
| Sen2 (St85)  | 43.8        |             | 42.9        | 43.4        | 49.2        | 45.5        | 31.7        | 22.3         | 28.3        | 18.0        | 14.3       | 21.3        | 22.1         | 23.5         | 16.8         | 20.4        |
| Eco4 (Ec83)  | 42.0        | 42.9        |             | 45.8        | 39.8        | 45.7        | 27.0        | 22.8         | 23.4        | 16.0        | 13.5       | 20.1        | 20.3         | 21.4         | 18.2         | 18.9        |
| Vpa1 (Vp96)  | 58.2        | 43.4        | 45.8        |             | 41.2        | 43.3        | 26.6        | 23.6         | 24.5        | 16.9        | 13.7       | 21.8        | 20.9         | 22.8         | 16.9         | 17.8        |
| Vch2 (Vc81)  | 42.0        | 49.2        | 39.8        | 41.2        |             | 39.9        | 28.4        | 22.2         | 22.0        | 16.1        | 14.8       | 21.0        | 21.5         | 24.0         | 16.7         | 18.6        |
| Vch1 (Vc95)  | 42.0        | 45.5        | 45.7        | 43.3        | 39.9        |             | 27.2        | 19.7         | 23.1        | 16.1        | 13.9       | 20.7        | 20.7         | 21.4         | 16.5         | 19.5        |
| Eco3 (Ec73)  | 27.7        | 31.7        | 27.0        | 26.6        | 28.4        | 27.2        |             | 21.3         | 22.8        | 14.5        | 15.1       | 21.6        | 22.3         | 22.0         | 20.6         | 18.7        |
| Eco5 (Ec107) | 24.8        | 22.3        | 22.8        | 23.6        | 22.2        | 19.7        | 21.3        |              | 24.0        | 22.0        | 19.6       | 24.4        | 25.7         | 23.0         | 24.5         | 22.2        |
| Eco1 (Ec86)  | 23.8        | 28.3        | 23.4        | 24.5        | 22.0        | 23.1        | 22.8        | 24.0         |             | 20.4        | 18.1       | 24.7        | 24.8         | 26.2         | 25.4         | 25.8        |
| Sen1 (Se72)  | 15.4        | 18.0        | 16.0        | 16.9        | 16.1        | 16.1        | 14.5        | 22.0         | 20.4        |             | 25.1       | 17.5        | 17.7         | 17.5         | 19.2         | 19.6        |
| Ec6 (Ec48)   | 15.9        | 14.3        | 13.5        | 13.7        | 14.8        | 13.9        | 15.1        | 19.6         | 18.1        | 25.1        |            | 15.7        | 16.9         | 18.4         | 16.2         | 16.6        |
| Mxa2 (Mx65)  | 21.2        | 21.3        | 20.1        | 21.8        | 21.0        | 20.7        | 21.6        | 24.4         | 24.7        | 17.5        | 15.7       |             | 34.5         | 33.3         | 31.4         | 19.9        |
| Sau1 (Se163) | 22.3        | 22.1        | 20.3        | 20.9        | 21.5        | 20.7        | 22.3        | 25.7         | 24.8        | 17.7        | 16.9       | 34.5        |              | 73.0         | 35.4         | 23.4        |
| Mxa1 (Mx162) | 23.8        | 23.5        | 21.4        | 22.8        | 24.0        | 21.4        | 22.0        | 23.0         | 26.2        | 17.5        | 18.4       | 33.3        | 73.0         |              | 34.5         | 23.3        |
| Nex2 (Ne144) | 19.7        | 16.8        | 18.2        | 16.9        | 16.7        | 16.5        | 20.6        | 24.5         | 25.4        | 19.2        | 16.2       | 31.4        | 35.4         | 34.5         |              | 21.7        |
| Eco2 (Ec67)  | 21.8        | 20.4        | 18.9        | 17.8        | 18.6        | 19.5        | 18.7        | 22.2         | 25.8        | 19.6        | 16.6       | 19.9        | 23.4         | 23.3         | 21.7         |             |

**Table S1. Comparison of retron RT sequence identity.** Identity was compared by aligning all RT sequences in NCBI's online Constrain-based Multiple Alignment Tool (COBALT) (2), with the following parameters: gap penalty opening: -11; gap penalty extension: -1; end gap opening: -5; end gap extension: -1; RPS BLAST to guide alignment on; constrain E-value 0.003; find conserved columns and recompute alignment on; use query clustering parameters on; word size 4; max cluster distance 0.8; and alphabet regular.

## REFERENCES

1. Zuker, M. (2003) Mfold web server for nucleic acid folding and hybridization prediction. *Nucleic Acids Research*, **31**, 3406-3415.
2. Papadopoulos, J.S. and Agarwala, R. (2007) COBALT: constraint-based alignment tool for multiple protein sequences. *Bioinformatics*, **23**, 1073-1079.
